# Supplementary material
Source: publisher site journal article supplement (https://www.spandidos-publications.com/6477/downloadSupplementary)
Supplement: Supplementary file 1 [file downloadSupplementary]

**Data S1. Gene/protein names and their corresponding abbreviations.**

|           |                                                     |
|-----------|-----------------------------------------------------|
| ACAA2     | Acetyl-CoA acyltransferase 2                        |
| ABCA12    | ATP binding cassette subfamily A member 12          |
| ABL2      | ABL proto-oncogene 2, non-receptor tyrosine kinase  |
| AFAP1-AS1 | Actin filament associated protein 1 antisense RNA 1 |
| Ago2      | Argonaute-2                                         |
| AGPG      | Actin gamma 1 pseudogene                            |
| ALKBH5    | Alkb homolog 5, RNA demethylase                     |
| ac4C      | N4-acetylcytidine                                   |
| BAALC     | Binder of MAP3K1 and KLF4                           |
| BBOX1     | Gamma-butyrobetaine hydroxylase 1                   |
| BCAR4     | Breast Cancer Anti-Estrogen Resistance 4            |
| BCL9      | BCL9 transcription coactivator                      |
| BMI1      | BMI1 proto-oncogene, polycomb ring finger           |
| CASC2     | Cancer susceptibility candidate 2                   |
| CASC8     | Cancer susceptibility candidate 8                   |
| CASC15    | Cancer susceptibility candidate 15                  |
| CCAT2     | Colon cancer associated transcript 2                |
| CCND1     | Cyclin D1                                           |
| CD44      | CD44 molecule (IN blood group)                      |
| CD151     | CD151 molecule (Raph blood group)                   |
| CDC25A    | Cell division cycle 25A                             |
| CDC25B    | Cell division cycle 25B                             |
| CDC42     | Cell division cycle 42                              |
| CDK1      | Cyclin dependent kinase 1                           |
| CTNNB1    | Catenin beta 1                                      |
| C-met     | MET proto-oncogene, receptor tyrosine kinase        |
| C9orf139  | Chromosome 9 open reading frame 72                  |
| DANCR     | Differentiation antagonizing non-protein coding RNA |
| DGCR5     | DiGeorge syndrome critical region gene 5            |
| DLEU1     | Deleted in lymphocytic leukemia 1                   |

|            |                                                                 |
|------------|-----------------------------------------------------------------|
| DPAGT1     | Dolichyl-phosphate<br>N-acetylglucosaminophosphotransferase 1   |
| DYNLL1     | Dynein light chain LC8-type 1                                   |
| DUSP6      | Dual specificity phosphatase 6                                  |
| DUXAP10    | Double homeobox A pseudogene 10                                 |
| DVL3       | Dishevelled segment polarity protein 3                          |
| ELAVL1     | ELAV like RNA binding protein 1                                 |
| EZH2       | Enhancer of zeste 2 polycomb repressive complex 2 subunit       |
| EIF5A      | Eukaryotic translation initiation factor 5A                     |
| ENPEP      | Glutamyl aminopeptidase                                         |
| EIF4A3     | Eukaryotic translation initiation factor 4A3                    |
| E2F1       | E2F transcription factor 1                                      |
| E2F4       | E2F transcription factor 4                                      |
| EEPD1      | Endonuclease/exonuclease/phosphatase family domain containing 1 |
| ELF3       | E74 like ETS transcription factor 3                             |
| EGFR       | Epidermal growth factor receptor                                |
| ESCCAL-1   | ESCC-related lncRNAs transcript 1                               |
| FAM83A-AS1 | Family with sequence similarity 83, member A, antisense RNA 1   |
| FAM83H-AS1 | Family with sequence similarity 83, member H, antisense RNA 1   |
| FAM225A    | Family with sequence similarity 225, member A                   |
| FUS        | FUS RNA binding protein                                         |
| FSCN1      | Fascin actin-bundling protein 1                                 |
| FOXM1      | Forkhead box M1                                                 |
| FYN        | FYN proto-oncogene, Src family tyrosine kinase                  |
| FN1        | Fibronectin 1                                                   |
| FOXP4      | Forkhead box P4                                                 |
| FTO        | FTO alpha-ketoglutarate dependent dioxygenase                   |
| FOXC2      | Forkhead box C2                                                 |
| FOXD2      | Forkhead box D2                                                 |

|               |                                                                                                      |
|---------------|------------------------------------------------------------------------------------------------------|
| FGFR2         | Fibroblast growth factor receptor 2                                                                  |
| FOXP1         | Forkhead box P1                                                                                      |
| GACAT3        | Gastric cancer associated transcript 3                                                               |
| GATA2         | GATA binding protein 2                                                                               |
| GK-IT1        | GK intronic transcript 1                                                                             |
| Girdin        | Girdin                                                                                               |
| G3BP2         | GTPase activating protein (SH3 domain) binding protein                                               |
| GPX4          | Glutathione peroxidase 4                                                                             |
| GLUT4/SLC2A4  | Solute carrier family 2 (facilitated glucose transporter), member 4/solute carrier family 2 member 4 |
| GSTP1         | Glutathione S-transferase pi 1                                                                       |
| HCP5          | HLA complex P5                                                                                       |
| HK2           | Hexokinase 2                                                                                         |
| H2AX          | H2A.X variant histone                                                                                |
| H3K4me3       | Tri-methylation of lysine 4 on histone H3                                                            |
| HMGA1         | High mobility group AT-hook 1                                                                        |
| HIF1 $\alpha$ | Hypoxia inducible factor 1 subunit alpha                                                             |
| HDAC11        | Histone deacetylase 11                                                                               |
| HOXB2         | Homeobox B2                                                                                          |
| HDAC9         | Histone deacetylase 9                                                                                |
| HDGF          | Heparin binding growth factor                                                                        |
| HDM2/MDM2     | MDM2 proto-oncogene                                                                                  |
| HEIH          | High expression in hepatocellular carcinoma                                                          |
| HNF1A-AS1     | Hepatocyte nuclear factor 1 alpha antisense RNA 1                                                    |
| HNRNPC        | Heterogeneous nuclear ribonucleoprotein C                                                            |
| hnRNPL        | Heterogeneous nuclear ribonucleoprotein L                                                            |
| HTR3A         | 5-hydroxytryptamine receptor 3A                                                                      |
| HOXB13        | Homeobox B13                                                                                         |
| HOXC-AS1      | HOXC cluster antisense RNA 1                                                                         |
| HIF1AN        | Hypoxia inducible factor 1 subunit alpha inhibitor                                                   |
| Hsp27         | Heat shock protein 27                                                                                |

|              |                                                        |
|--------------|--------------------------------------------------------|
| HNRNPF       | Heterogeneous nuclear ribonucleoprotein F              |
| IDO1         | Indoleamine 2,3-dioxygenase 1                          |
| ILF2         | Interleukin enhancer binding factor 2                  |
| IGF2         | Insulin like growth factor 2                           |
| IGF2BP2      | Insulin like growth factor 2 mRNA binding protein 2    |
| ILF3         | Interleukin enhancer binding factor 3                  |
| JAK2         | Janus kinase 2                                         |
| JPX          | Juxtaposed with X-inactivation center                  |
| JUN          | Jun proto-oncogene, AP-1 transcription factor subunit  |
| JUNB         | JunB proto-oncogene, AP-1 transcription factor subunit |
| KDM4A-AS1    | Lysine demethylase 4A antisense RNA 1                  |
| KLF2         | KLF transcription factor 2                             |
| KLF3         | KLF transcription factor 3                             |
| KLF4         | KLF transcription factor 4                             |
| KLF10        | KLF transcription factor 10                            |
| KTN1         | Kinectin 1                                             |
| LGALS1/Gal-1 | Galectin 1                                             |
| LRP6         | LDL receptor related protein 6                         |
| LASP1        | LIM and SH3 protein 1                                  |
| LBX2         | Ladybird homeobox 2                                    |
| LEF1         | Lymphoid enhancer binding factor 1                     |
| LINK-A       | Long intergenic noncoding RNA for kinase activation    |
| LIPH-4       | Lipase H 4                                             |
| LUESCC       | Homo sapiens uncharacterized LOC100507002              |
| MAPK1        | Mitogen-activated protein kinase 1                     |
| Mcl-1        | Myeloid cell leukemia 1                                |
| MAFG-AS1     | MAF BZIP transcription factor G antisense RNA 1        |
| MALR         | Macrophage-associated long noncoding RNA               |
| MBP-1        | Promoter-binding protein-1                             |
| MYO5A        | Myosin VA                                              |
| MDM2         | MDM2 proto-oncogene                                    |
| miR31HG      | MIR31 host gene                                        |

|             |                                                                        |
|-------------|------------------------------------------------------------------------|
| MLL1        | Mixed lineage leukemia protein 1                                       |
| MLL2        | Mixed lineage leukemia protein 2                                       |
| MNX1-AS1    | Motor neuron and pancreas homeobox 1 antisense RNA 1                   |
| MCM/PIK3CA  | Phosphatidylinositol-4,5-bisphosphate 3-kinase catalytic subunit alpha |
| MT1M        | Metallothionein 1M                                                     |
| MTA2        | Metastasis associated 1 family member 2                                |
| MTDH        | Metadherin                                                             |
| MTX2        | Metaxin 2                                                              |
| NCK1        | NCK adaptor protein 1                                                  |
| NRSN2       | Neurensin 2                                                            |
| NP90/ILF3   | Interleukin enhancer binding factor 3                                  |
| NAT10       | N-acetyltransferase 10                                                 |
| NEAT1       | Nuclear paraspeckle assembly transcript 1                              |
| NF-κB       | Nuclear factor kappa-B                                                 |
| NETO2       | Neuropilin and tolloid like 2                                          |
| NORAD       | Non-coding RNA activated by DNA damage                                 |
| NPM1        | Nucleophosmin 1                                                        |
| NLIPMT      | Novel lncRNA inhibiting proliferation and metastasis                   |
| NNT-AS1     | Nicotinamide nucleotide transhydrogenase antisense RNA 1               |
| OCT4/POU5F1 | Octamer-binding transcription factor 4/POU class 5 homeobox 1          |
| OIP5-AS1    | Opa interacting protein 5 antisense RNA 1                              |
| PFKFB3      | 6-Phosphofructo-2-kinase/fructose-2,6-biphosphatase 3                  |
| PCAT5       | Prostate cancer associated transcript 5                                |
| PCAT6       | Prostate cancer associated transcript 6                                |
| PCNA        | Proliferating cell nuclear antigen                                     |
| PDK1        | Pyruvate dehydrogenase kinase 1                                        |
| PDCD5       | Programmed cell death 5                                                |
| PDIA3P1     | Protein disulfide isomerase family A member 3 pseudogene 1             |

|            |                                                        |
|------------|--------------------------------------------------------|
| PD-L1      | Programmed cell death 1 ligand 1                       |
| PRKAA1     | Protein kinase AMP-activated catalytic subunit alpha 1 |
| PAK6       | p21 (RAC1) activated kinase 6                          |
| PART1      | Prostate androgen-regulated transcript 1               |
| PBX3       | PBX homeobox 3                                         |
| PDX1       | Pancreatic and duodenal homeobox 1                     |
| PTGS2      | Prostaglandin-endoperoxide synthase 2                  |
| PHD/PDC    | Phosducin                                              |
| PHF8       | PHD finger protein 8                                   |
| PHF20      | PHD finger protein 20                                  |
| PFN2       | Profilin 2                                             |
| PMEPA1     | Prostate transmembrane protein, androgen induced 1     |
| PTCH1      | Patched 1                                              |
| PTPRG      | Protein tyrosine phosphatase receptor type G           |
| PTPN12     | Protein tyrosine phosphatase non-receptor type 12      |
| PGK1       | Phosphoglycerate kinase 1                              |
| P21/CDKN1A | Cyclin dependent kinase inhibitor 1A                   |
| PUM1       | Pumilio RNA binding family member 1                    |
| PSMA3      | Proteasome 20S subunit alpha 3                         |
| PTBP1      | Polypyrimidine tract binding protein 1                 |
| PRUNE2     | Prune homolog 2 with BCH domain                        |
| RASA1      | RAS p21 protein activator 1                            |
| RASSF8     | Ras association domain family member 8                 |
| RISC       | RNA-induced silencing complex                          |
| RNF114     | Ring finger protein 114                                |
| ROCK1      | Rho associated coiled-coil containing protein kinase 1 |
| ROR        | Nuclear receptor                                       |
| RAB14      | RAB14, member RAS oncogene family                      |
| RAB10      | RAB10, member RAS oncogene family                      |
| RBBP4      | RB binding protein 4, chromatin remodeling factor      |
| RPL34      | Ribosomal protein L34                                  |
| SBF2       | SET binding factor 2                                   |

|           |                                                      |
|-----------|------------------------------------------------------|
| SRSF1     | Serine and arginine rich splicing factor 1           |
| SLC7A11   | Solute carrier family 7 member 11                    |
| SOX4      | SRY-box transcription factor 4                       |
| STAT3     | Signal transducer and activator of transcription 3   |
| SIGLEC9   | Sialic acid binding Ig like lectin 9                 |
| SIRT1     | Sirtuin 1                                            |
| SIRT7     | Sirtuin 7                                            |
| SIM2      | Single-minded 2                                      |
| SGMS2     | Sphingomyelin synthase 2                             |
| SNHG17    | Small nucleolar RNA host gene 17                     |
| STRN3     | Striatin 3                                           |
| SPHK1     | Sphingosine kinase 1                                 |
| SPIN1     | Spindlin 1                                           |
| SOX2      | SRY-box transcription factor 2                       |
| SOX2OT    | SOX2 overlapping transcript                          |
| SLC25A21  | Solute carrier family 25 member 21                   |
| SKA1      | Spindle and kinetochore associated complex subunit 1 |
| SPI1      | Spi-1 proto-oncogene                                 |
| SF3B3     | Splicing factor 3b subunit 3                         |
| SOX6      | SRY-box transcription factor 6                       |
| SOCS1     | Suppressor of cytokine signaling 1                   |
| SOCS2     | Suppressor of cytokine signaling 2                   |
| SOCS4     | Suppressor of cytokine signaling 4                   |
| SMAD4     | SMAD family member 4                                 |
| SNHG5     | Small nucleolar RNA host gene 5                      |
| SNHG6     | Small nucleolar RNA host gene 6                      |
| SNHG12    | Small nucleolar RNA host gene 12                     |
| TRBP      | Transactivation response element RNA-binding protein |
| TCF4      | Transcription factor 4                               |
| THAP9-AS1 | THAP domain-containing protein 9 Antisense RNA 1     |
| TRAF4     | TNF receptor associated factor 4                     |
| TK1       | Thymidine kinase 1                                   |

|              |                                                          |
|--------------|----------------------------------------------------------|
| TPX2         | TPX2 microtubule nucleation factor                       |
| TMEM44       | Transmembrane protein 44                                 |
| TMEM161B     | Transmembrane protein 161B                               |
| TMPO         | Thymopoietin                                             |
| TP53         | Tumor protein p53                                        |
| TNF $\alpha$ | Tumor necrosis factor alpha-like                         |
| TOB1         | Transducer of ERBB2, 1                                   |
| TTY15        | Testis-specific transcript, Y-linked 15                  |
| TTP          | ZFP36 ring finger protein                                |
| TUG1         | Taurine Upregulated Gene 1                               |
| UTP3         | UTP3 small subunit processome component                  |
| VAMP3        | Vesicle associated membrane protein 3                    |
| VEGFA        | Vascular endothelial growth factor A                     |
| VEGF         | Vascular endothelial growth factor                       |
| WDFY3        | WD repeat and FYVE domain containing 3                   |
| XIST         | X-inactive specific transcript                           |
| YBX1         | Y-box binding protein 1                                  |
| YTHDF2       | YTH N6-methyladenosine RNA binding protein F2            |
| YTHDF1       | YTH N6-methyladenosine RNA binding protein F1            |
| ZFAS1        | ZNFX1 antisense RNA 1                                    |
| ZFPM2-AS1    | zinc finger protein, FOG family member 2 antisense RNA 1 |
| ZEB1         | Zinc finger E-box binding homeobox 1                     |
| ZEB          | Zinc finger E-box binding homeobox                       |
| ZNF184       | Zinc finger protein 184                                  |
| ZNF667       | Zinc finger protein 667                                  |
| ZNF750       | Zinc finger protein 750                                  |
